# Supplementary material for: The Reconstruction of Condition-Specific Transcriptional Modules Provides New Insights in the Evolution of Yeast AP-1 Proteins
Source: PLOS journal article supplement (doi:10.1371/journal.pone.0020924), 2011-06-09
Supplement: S7 (10.1371/journal.pone.0020924.s007) [file journal.pone.0020924.s007]

**Text S5.** Description of the Yap family in yeast species *S. cerevisiae*, *C. glabrata* and *C. albicans*.

To identify the members of the Yap family in each yeast species, we used a general strategy comparable to this presented in [1]. Results obtained in *C. glabrata* and *C. albicans* were also manually inspected. In *C. glabrata* seven members were identified, whereas in *C. albicans* only 4 members were found (see below). This lower number of AP-1 transcription factors in *C. albicans* is connected to the whole genome duplication that arose in the common history of *S. cerevisiae* and *C. glabrata*, but not in the *C. albicans* ancestors.

| Gene name                       | Description                                                                                                                                                                                                                                                           |
|---------------------------------|-----------------------------------------------------------------------------------------------------------------------------------------------------------------------------------------------------------------------------------------------------------------------|
| <i>Saccharomyces cerevisiae</i> |                                                                                                                                                                                                                                                                       |
| YML007W YAP1                    | Basic leucine zipper (bZIP) transcription factor required for oxidative stress tolerance; activated by H <sub>2</sub> O <sub>2</sub> through the multistep formation of disulfide bonds and transit from the cytoplasm to the nucleus; mediates resistance to cadmium |
| YDR423C YAP2                    | AP-1-like basic leucine zipper (bZIP) transcriptional activator involved in stress responses, iron metabolism, and pleiotropic drug resistance; controls a set of genes involved in stabilizing proteins; binds consensus sequence TTACTAA                            |
| YHL009C YAP3                    | Basic leucine zipper (bZIP) transcription factor                                                                                                                                                                                                                      |
| YOR028C YAP4                    | Basic leucine zipper (bZIP) transcription factor of the yAP-1 family, mediates pleiotropic drug resistance and salt tolerance; nuclearly localized under oxidative stress and sequestered in the cytoplasm by Lot6p under reducing conditions                         |
| YIR018W YAP5                    | Basic leucine zipper (bZIP) transcription factor                                                                                                                                                                                                                      |
| YDR259C YAP6                    | Putative basic leucine zipper (bZIP) transcription factor; overexpression increases sodium and lithium tolerance; computational analysis suggests a role in regulation of expression of genes involved in carbohydrate metabolism                                     |
| YOL028C YAP7                    | Putative basic leucine zipper (bZIP) transcription factor                                                                                                                                                                                                             |
| YPR199C YAP8                    | Transcriptional activator of the basic leucine zipper (bZIP) family, required for transcription of genes involved in resistance to arsenic compounds                                                                                                                  |
| <i>Candida glabrata</i>         |                                                                                                                                                                                                                                                                       |
| CAGL0H04631g                    | similar to uniprot P19880 <i>Saccharomyces cerevisiae</i> YML007w YAP1 (ohnolog of YDR423C) Basic leucine zipper (bZIP) transcription factor required for oxidative stress tolerance                                                                                  |

|                         |                                                                                                                                                                                                                                                        |
|-------------------------|--------------------------------------------------------------------------------------------------------------------------------------------------------------------------------------------------------------------------------------------------------|
| CAGL0F03069g            | some similarities with uniprot P24813 <i>Saccharomyces cerevisiae</i> YDR423c CAD1 (ohnolog of YML007W) AP-1-like basic leucine zipper (bZIP) transcriptional activator involved in stress responses, iron metabolism, and pleiotropic drug resistance |
| CAGL0K02585g            | some similarities with uniprot P38749 <i>Saccharomyces cerevisiae</i> YHL009c YAP3 Basic leucine zipper (bZIP) transcription factor                                                                                                                    |
| CAGL0M10087g            | some similarities with uniprot P38749 <i>Saccharomyces cerevisiae</i> YHL009c YAP3 Basic leucine zipper (bZIP) transcription factor                                                                                                                    |
| CAGL0M08800g            | weakly similar to uniprot Q03935 <i>Saccharomyces cerevisiae</i> YDR259c YAP6 (ohnolog of YOR028C) Putative basic leucine zipper (bZIP) transcription factor                                                                                           |
| CAGL0F01265g            | some similarities with uniprot Q08182 <i>Saccharomyces cerevisiae</i> YOL028c YAP7 (ohnolog of YIR018W) Putative basic leucine zipper (bZIP) transcription factor                                                                                      |
| CAGL0K08756g            | weakly similar to uniprot P40574 <i>Saccharomyces cerevisiae</i> YIR018w YAP5 (ohnolog of YOL028C) Basic leucine zipper (bZIP) transcription factor                                                                                                    |
| <i>Candida albicans</i> |                                                                                                                                                                                                                                                        |
| orf19.1623 CAP1         | Transcription factor, AP-1 family; role in oxidative stress response and resistance, multidrug resistance; oxidative stress regulates nuclear localization; partially complements <i>S. cerevisiae</i> yap1 mutation; human neutrophil-induced         |
| orf19.3193 FCR3         | Transcriptional regulator of the bZip family; partially functionally complements the fluconazole sensitivity of an <i>S. cerevisiae</i> pdr1 pdr3 double mutant; probable ortholog of <i>S. cerevisiae</i> Yap3p                                       |
| orf19.681 HAP43         | CCAAT-binding factor (CBF)-dependent transcription factor required for iron-limitation response; similar to transcription factor AP-1; transcription is negatively regulated by Sfu1p; ciclopirox olamine induced                                      |
| orf19.861               | Predicted transcriptional regulator with bZip domain; possibly an essential gene, disruptants not obtained by UAU1 metho                                                                                                                               |

Gene descriptions were obtained from the following websites : SGD <http://www.yeastgenome.org/> (for *S. cerevisiae*), Genolevures <http://www.genolevures.org/> (for *C. glabrata*) and CGD <http://www.candidagenome.org/> (for *C. albicans*).

## Reference

1. Fernandes, L., C. Rodrigues-Pousada, and K. Struhl, *Yap, a novel family of eight bZIP proteins in Saccharomyces cerevisiae with distinct biological functions*. Mol Cell Biol, 1997. **17**(12): p. 6982-93.
